# Supplementary material
Source: publisher figshare collection journal article supplement (https://karger.figshare.com/ndownloader/files/25790924)
Supplement: Supplementary file 1 [file 25790924]

**Table 1S.** Measures taken by the IEO Radiotherapy Division to fight the pandemic during March-April 2020

| **Measures** | **Patients** | **Personnel** | **Comments** |
| --- | --- | --- | --- |
| **Personal protective equipment** | ●Facial masks  ●Optional gloves  ●Hand hygiene | ●Surgical facial masks  ●Hand hygiene  ●Gloves  ●N-95 mask, disposable long-sleeve gown, cap and goggle or eye protection if close contact with pts | Gradually implemented starting from the end of February 2020 |
| **Access to RT Division** | ●Pts only  ●Pts allowed in shortly before their scheduled treatment time  ●2-level triage at the RT Division entrance: body temperature + brief investigations on any suspicious symptoms  ●Case-by case management of any symptomatic pts (dedicated pathway) | ●2-level triage at the RT Division entrance (body temperature) | ●Care-giver admitted upon special permission  ● 1-level triage at the entrance of IEO for body temperature only  ●Dedicated nurses available on call for nasopharyngeal swabs. Radiological team for lung CT.  If tested positive, pts were transferred to Covid-19 Hospital |
| **Reorganization** | ●Waiting rooms adapt to sit pts one meter apart  ●Pts scheduled for CT simulation checked on by phone the day before  ● Pts provided with leaflet with instructions in case of symptoms  ●Waiting -and treatment -room sanitization after any suspected Covid-19 carrier | ●Creation of COVID-19 RT team (Task Force) including the Director of RT Division, 3 senior ROs, the Head nurse and Head radiation technologist.  ●Phone line dedicated to any symptomatic pts staffed 12-hour a day  ●Working shifts for non- permanent medical staff | ●Trained RT nurses to check pts’ health status before their admission to RT (any suspicious symptoms or contact with Covid-19 carrier)  ● COVID-19 RT Task Force in charge of contingency plan |
| **Clinical visits and meetings** | ●Follow-up visits made by phone. If needed, pts were relocated (backlog: 25 pts,15%).  ●Pts advised to have RT close to home | ●Follow-up clinics cancelled or postponed (170 phone calls were made)  ●Telephone- based consultation to replace person- to -person interaction (160 phone-based consultations)  ●Multidisciplinary boards moved to digital platform | ●Maintain a bond with pts to avoid feeling of abandonment  ● To fit the position of Hub for cancer care |

*List of abbreviations:* **COVID-19:** corona virus disease 19; **CT:** computed tomography; **GP:** general practitioner; **IEO:** European Institute of Oncology IRCSS; **pts:** patients; **RT:** Radiotherapy.

**Table 2S.** Summary of national and international Guidelines for breast cancer radiotherapy during the COVID-19 pandemic compared to the IEO clinical practice during the pandemic outbreak.

| **Topic** | **National COVID-19 Guidelines** [2,9] | **International COVID-19 Guidelines** [3,4] | **IEO RT workflow** |
| --- | --- | --- | --- |
| **Nodal RT** | Nodal RT can be omitted in post-menopausal women requiring WBRT following SLNB and BCS for T1, ER+, HER2-, and Grade 1-2 with 1-2 macrometastases (high priority). | *UK*: Nodal RT can be omitted in post-menopausal women requiring WBRT following SLNB and BCS for T1, ER+, HER2-, Grade 1-2, with 1-2 macrometastases . | *As per internal policy, Luminal A tumors do not receive nodal RT if extra nodal extension ≤ 2 mm and no LVI* [26]. |
| **PORT** | Continue and complete the ongoing RT (high priority). |  | *None of the asymptomatic pts discontinued BC RT*  *Case-by-case management of symptomatic pts* |
| Postoperative RT in high-risk pts (inflammatory cancer, nodal positive, Triple negative, HER2+, residual disease after neoadjuvant CHT, age< 40 (high priority). |  | *No change in clinical routine* |
| Postoperative RT within maximum 5 months of surgery and 2 months of the end of CHT in low- and intermediate-risk pts (i.e. age< 65, luminal tumors, stage I/II) (medium priority). | *USA:* RT safely delayed up to 12 wks following BCS for DCIS.  Early-stage BC, N0, ER+ can safely begin RT 8-12 wks after BCS, and up to 20 wks in appropriate subset . | *RT delay was handled with caution. The recommended timing was always respected.* |
| **Hypofractionation**  **Hypofractionation** | Hypofractionation, if adequate, to reduce the attendance (medium priority). | *UK*: Moderate hypofractionation should be used for all breast/chest wall and nodal RT, e.g. 40 Gy in 15 fr/3 wks .  *USA*: for WBRT without nodal RT, hypofractionation is the national preferred standard of care . | *Moderate hypofractionation is our clinical routine: 3-wk scheme used for both PMRT and WBRT (± SIB)* [27,28]. |
|  | *UK*: Deliver RT in 5 fr only for pts requiring RT with N0 tumors without need of boost. Options include 28-30 Gy in once weekly fr/5 wks or 26 Gy in 5 daily fr/1 wk, as per the FAST and FAST Forward trials respectively. | *According to FAST trial, 28.5 Gy in once weekly fr/5wks is part of clinical routine in selected pts (over 65, with comorbidities, commuting difficulties, etc.).* |
| **RT omission** | For low–risk pts over 70 (i.e. stage I, Grade 1-2 , no tumor on ink, ER+ and HER2-), consider omission of RT if receiving endocrine therapy, after benefit/risk assessment and informed consent (low priority). | *UK*: RT omission for pts aged ≥65 (or younger with co-morbidities) with invasive BC ≤ 3 cm, N0, clear margins, Grade 1-2, ER+, HER2-, eligible for endocrine therapy *.*  *USA*: RT omission preferred for pts ≥ 70 with invasive BC ≤ 3 cm, clear margins, N0, ER+, eligible for endocrine therapy. | *For this group, RT omission of is one of the options routinely discussed during RT visit, outside the pandemics*  *During the pandemic peak, only one pt candidate for partial breast irradiation chose to forgo RT* |
| Consider omission of RT for unicentric DCIS, especially if low-grade, after radiologic correlation (low priority). | *USA*: Advisable to forego RT for screen-detected DCIS, ≤2.5cm, Grade 1-2, with ≥ 2mm resection margins. Caution for pts under 40 . | *As per internal policy, RT is omitted in Grade 1 and discussed as option in selected Grade 2* [29]*.* |
| **BOOST** |  | *UK*: Boost RT should be omitted to reduce fractions/complexity for most pts, unless aged ≤ 40, or >40 with high-risk factors .  *USA*: Boost for DCIS can be omitted (caution for under 40); for invasive BC consider boost only in presence of high-risk factors: age ≤60, Grade 3, or inadequate margins. | *Although SIB does not prolong treatment duration, it was less frequently delivered in selected pts (i.e, age> 60) over the pandemic peak.* |
| **APBI** |  | *USA*: APBI for pts aged ≥50 with screen-detected BC, ≤2cm, N0, ER+, or selected DCIS (Grade 1-2, ≤2.5cm). BRT is discouraged (strain on hospital resources, risk for exposure and infection). Evidence supported external APBI using 3D-CRT | *APBI: IOERT was not available, BRT was kept on hold to avoid hospitalization, external RT was used with 8-fr scheme, which was later reduced to 5 daily fr* |

*List of abbreviations:* **3D-CRT:** 3D-conformal RT **APBI:** accelerated partial breast irradiation; **ASTRO:** American Society of Radiation Oncology; **BC:** breast cancer; **BCS:** breast conserving surgery; **BRT:** brachytherapy; **CHT:** chemotherapy; **COVID-19:** corona virus disease-19; **DCIS:** ductal carcinoma in situ; **ER:** estrogen receptors; **fr:** fractions; **HER2:** Human epidermal growth factor receptor 2; **IOERT:** intraoperative radiotherapy with electrons; **LVI:** lymphovascular invasion; **N:** node; **PMRT:** post-mastectomy RT; **PORT:** postoperative RT; **pts:** patients; **RT:** radiotherapy; **SLNB:** sentinel node biopsy; **IEO:** European Institute of Oncology; **UK:** United Kingdom; **USA:** United States of America; **WBRT:** whole breast radiotherapy; **wk:** week; **3D-CRT:** three-dimensional conformal radiotherapy.

*References:*

26 Morigi C, Peradze N, Galimberti V, Leonardi MC, Radice D, Santomauro GI, et al. Feasibility and surgical impact of Z0011 trial criteria in a single-Institution practice. [Breast J](https://www.karger.com/Article/FullText/513227?ref=26" \l "ref26" \o "26). 2020 Jul;26(7):1330–6.

27 Orecchia R, Rojas DP, Cattani F, Ricotti R, Santoro L, Morra A, et al. Hypofractionated postmastectomy radiotherapy with helical tomotherapy in patients with immediate breast reconstruction: dosimetric results and acute/intermediate toxicity evaluation. [Med Oncol](https://www.karger.com/Article/FullText/513227?ref=27#ref27). 2018 Feb;35(3):39.

28 Leonardi MC, Spoto R, Miglietta E, Trivellato S, La Rocca E, Luraschi R, et al. HALFMOON TomoTherapy (Helical ALtered Fractionation for iMplant partial OmissiON): implant-sparing post-mastectomy radiotherapy reshaping the clinical target volume in the reconstructed breast. [J Cancer Res Clin Oncol](https://www.karger.com/Article/FullText/513227?ref=28#ref28). 2019 Jul;145(7):1887–96.

29 Farante G, Orecchia R, Luini A, Leonardi C, Zurrida S, Lissidini G, et al. Are all patients with ductal carcinoma in situ of the breast candidates for radiotherapy after breast conservative treatment? Institute of European Oncology Guidelines. [Breast J](https://www.karger.com/Article/FullText/513227?ref=29#ref29). 2014 Jul-Aug;20(4):431–3.
